# Supplementary material
Source: MDPI journal article supplement (https://www.mdpi.com/2077-0472/13/6/1230)
Supplement: s1 [file s1]

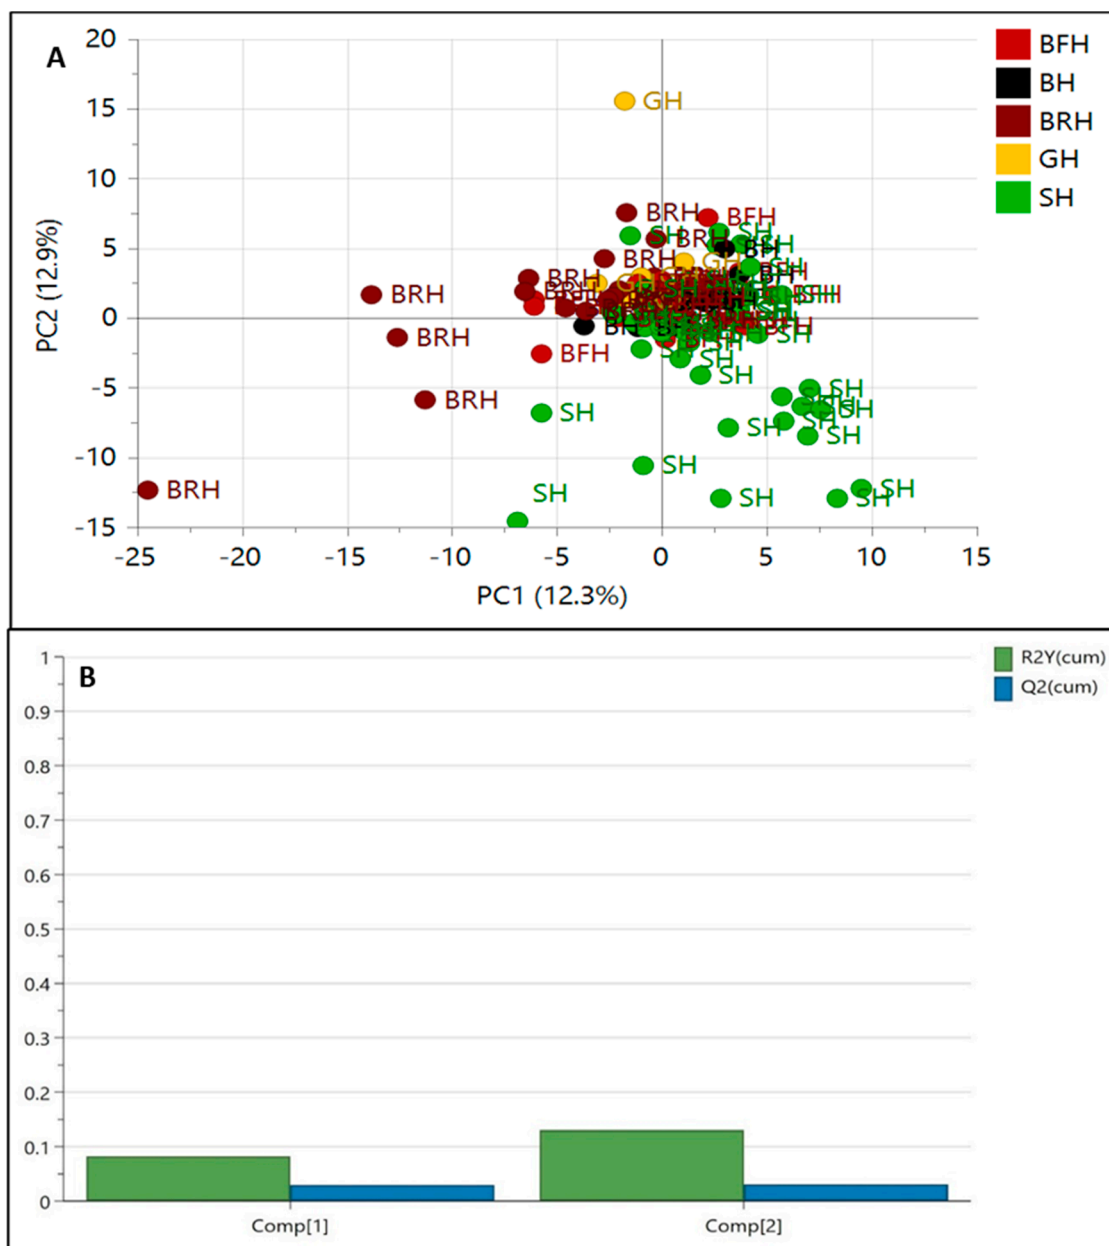

**Figure S2.** Score plot (A) of partial least square discriminant analysis (PLS-DA) of different hull colors in weedy rice and summary of fit (B) derived from  $^1H$  NMR spectra. BFH: brown furrow hull, BH: black hull, BRH: brown hull, GH: golden hull, SH: straw hull.
