# Supplementary material
Source: MDPI journal article supplement (https://www.mdpi.com/2077-0472/13/6/1230)
Supplement: s1 [file s1]

Archive with 4 entries (4 files):
- Fig S1.pdf
- Fig S2.pdf
- Table S1.xlsx
- Table S2.xlsx
