# Supplementary material
Source: MDPI journal article supplement (https://www.mdpi.com/2077-0472/13/6/1230)
Supplement: s1 [file s1 › Fig S1.pdf]

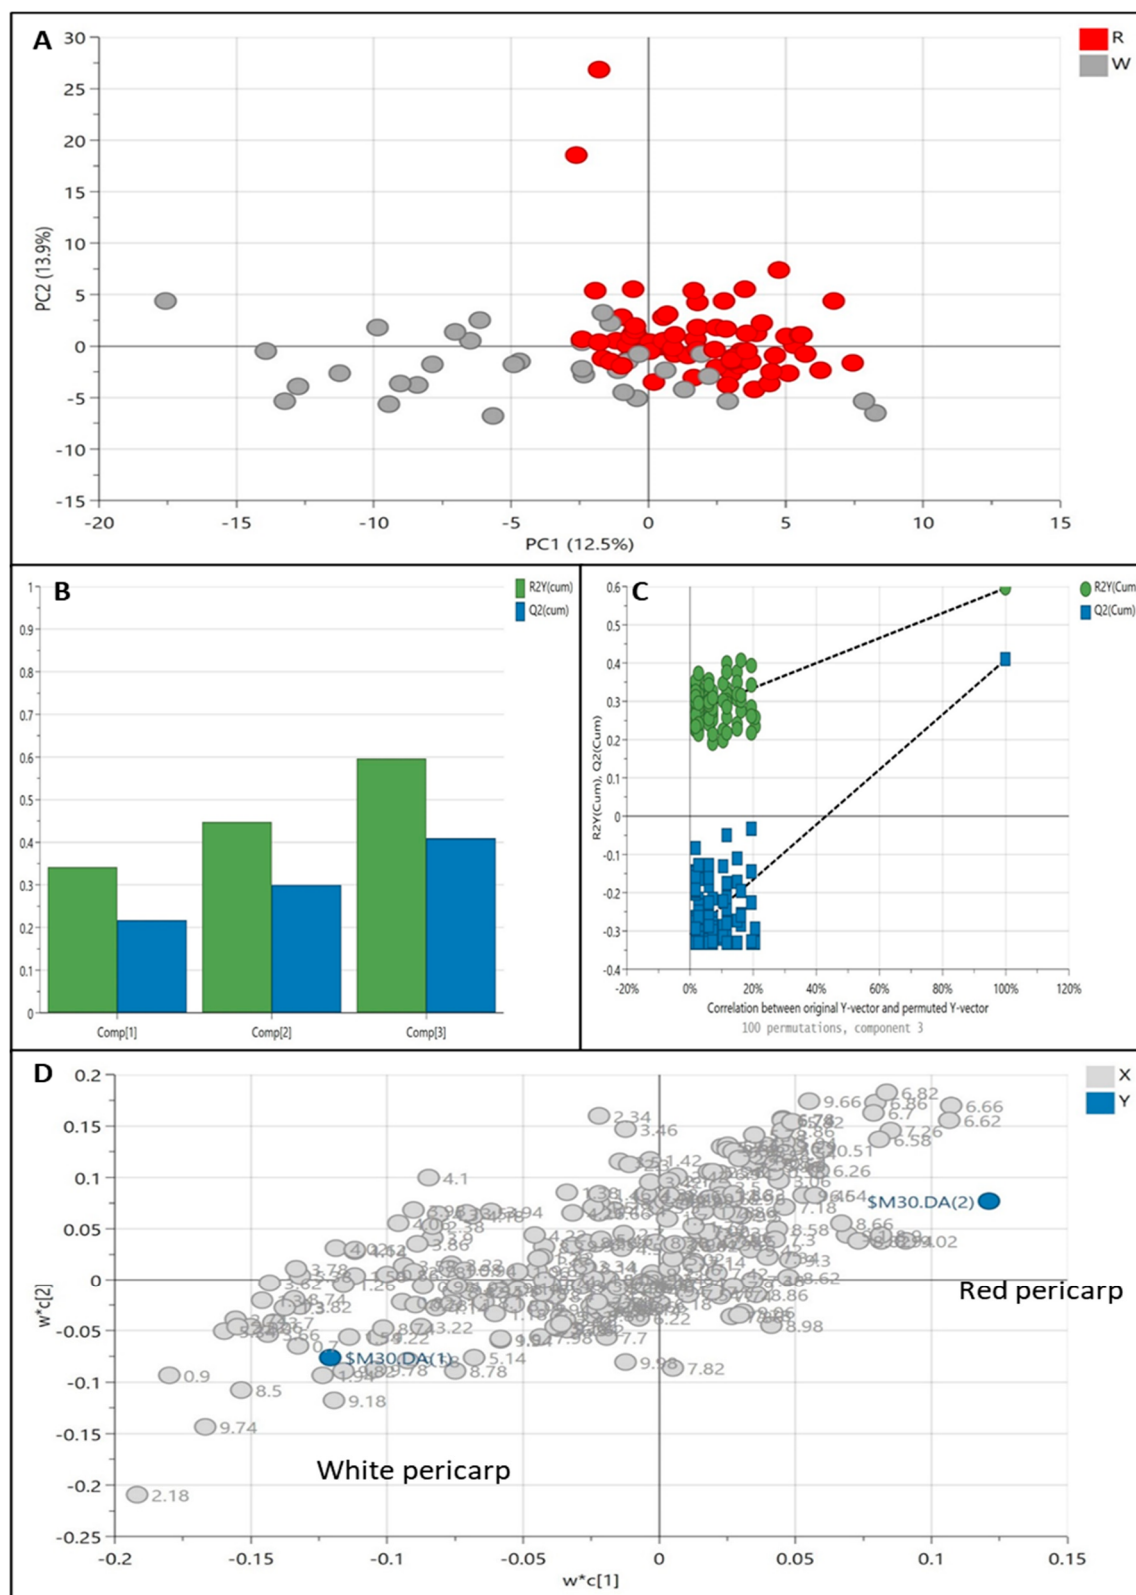

**Figure S1.** Score plot (A) of partial least square discriminant analysis (PLS-DA) derived from  $^1\text{H}$  NMR spectra of weedy rice with red pericarp (red dots) and white pericarp (grey dots) colour. Summary of fit (B) and permutation test (C) with  $R^2$  value (green) and  $Q^2$  value (blue). Loading plot (D) of PLS-DA with X variables of  $^1\text{H}$  NMR signals (grey dots) and Y variables of sample class: red pericarp and white pericarp colour (blue dots).
