# Supplementary material
Source: MDPI journal article supplement (https://www.mdpi.com/2077-0472/13/6/1230)
Supplement: s1 [file s1 › Table S1.xlsx]

## Sheet: Sheet1
Supplementary Table 1 Weedy rice samples collected at several locations in Peninsular Malaysia and their morphological characteristics
No. of sample	Weedy rice biotypes	Site Region	State	Location	Coordinate	Straw Colour	Hull colour	Existence of awn	Plant height	Panicle shattering
1	MWR014	West Coast	Selangor	Parit 2 Barat, Sg. Besar	3°70'N, 100°99'E	Straw	White	Awn	Intermediate	No
2	MWR020	West Coast	Selangor	Parit 1 Timur, Sg. Besar	3°67'N, 100°00'E	Furrow	Red	No	Intermediate	Yes
3	MWR040	West Coast	Selangor	Jln. Rajin Mas, Tjg. Karang	3°46'N, 101°21'E	Furrow	Red	No	Intermediate	Yes
4	MWR041	West Coast	Selangor	Jln. Ban 3, Tjg. Karang	3°45'N, 101°22'E	Black	Red	No	Intermediate	Yes
5	MWR046	West Coast	Penang	Sg. Tok Tuntung, Nibong Tebal	5°16'N, 100°44'E	Straw	White	No	Tall	Yes
6	MWR047	West Coast	Penang	Sg. Setar, Nibong Tebal	5°14'N, 100°45'E	Straw	Red	No	Tall	No
7	MWR050	West Coast	Penang	Tjg. Beremban, Nibong Tebal	5°15'N, 100°40'E	Furrow	Red	No	Short	Yes
8	MWR058	West Coast	Penang	Sg. Acheh, Nibong Tebal	5°14'N, 100°43'E	Straw	Red	Awn	Intermediate	No
9	MWR061	West Coast	Penang	Sg. Udang, Nibong Tebal	5°16'N, 100°42'E	Brown	Red	No	Intermediate	Yes
10	MWR065	West Coast	Perak	Sg. Buaya, Teluk Intan	4°05'N, 100°87'E	Straw	Red	Awn	Tall	Yes
11	MWR066	West Coast	Perak	Sg. Ulu Dedap, Teluk Intan	4°08'N, 100°94'E	Furrow	Red	No	Short	Yes
12	MWR068	West Coast	Perak	Sg. Kerang, Teluk Intan	4°02'N, 100°93'E	Straw	Red	Awn	Intermediate	No
13	MWR072	West Coast	Perak	Sg. Timah, Teluk Intan	4°05'N, 100°95'E	Brown	Red	No	Intermediate	Yes
14	MWR086	West Coast	Perak	Jalan Lebai Nawi, Kangar	6°34'N, 100°20'E	Furrow	White	No	Tall	Yes
15	MWR087	West Coast	Perlis	Sg. Abi, Kangar	6°53'N, 100°21'E	Golden	Red	Awn	Tall	Yes
16	MWR089	West Coast	Perlis	Wang Ulu, Kangar	6°46'N, 100°16'E	Straw	Red	No	Intermediate	No
17	MWR091	West Coast	Perlis	Kayang	6°37'N, 100°19'E	Brown	Red	No	Tall	Yes
18	MWR097	West Coast	Kedah	Kg. Siputeh, Kokdiang	6°36'N, 100°34'E	Straw	White	No	Intermediate	No
19	MWR101	West Coast	Kedah	Kg. Kandis, Kokdiang	6°38'N, 100°32'E	Furrow	Red	No	Intermediate	Yes
20	MWR106	West Coast	Kedah	Melele, Jitra	6°35'N, 100°35'E	Straw	Red	Awn	Short	No
21	MWR108	West Coast	Kedah	Kg. Pulau Kabu, Jitra	6°35'N, 100°33'E	Black	White	No	Tall	Yes
22	MWR109	East Coast	Terengganu	Sg. Gerung, Jerteh	5°70'N, 102°56'E	Straw	Red	No	Intermediate	Yes
23	MWR110	East Coast	Terengganu	Jln Putra, Besut	5°79'N, 102°59'E	Straw	White	Awn	Short	No
24	MWR113	East Coast	Terengganu	Kg. Apal, Jerteh	5°70'N, 102°54'E	Brown	Red	Awn	Tall	No
25	MWR123	East Coast	Terengganu	Kg. Lay Out, Besut	5°79'N, 102°56'E	Brown	Red	Awn	Tall	Yes
26	MWR127	East Coast	Terengganu	Sg. Kenak, Jertih	5°74'N, 102°52'E	Black	Red	Awn	Intermediate	Yes
27	MWR137	East Coast	Kelantan	Kg. Rusa, Bachok	6°01'N, 102°38'E	Brown	Red	Awn	Intermediate	No
28	MWR141	East Coast	Kelantan	Pdg. Melintang, Bachok	6°07'N, 102°39'E	Black	Red	Awn	Tall	Yes
29	MWR142	East Coast	Kelantan	Jelawat, Bachok	6°00'N, 102°38'E	Golden	White	No	Tall	No
30	MWR145	East Coast	Kelantan	Kg. Sri Sentosa, Bachok	6°06'N, 102°39'E	Furrow	Red	No	Tall	Yes
31	MWR148	East Coast	Kelantan	Pauh Sembilan, Bachok	5°90'N, 102°36'E	Straw	Red	No	Intermediate	Yes
