# Supplementary material
Source: MDPI journal article supplement (https://www.mdpi.com/2077-0472/13/6/1230)
Supplement: s1 [file s1 › Table S2.xlsx]

## Sheet: Sheet1
Supplementary Table 2 Location of weedy rice survey across Peninsular Malaysia
Site ID	Site Region	State (Government Authority)	Population Code	Locations	Coordinate	Planted area (Ha)	Rice production (MT)	Yield (MT/Ha)	Use of rice varieties	Planting/Harvesting Period	Methods of planting	Mean Monthly rainfall, annual (mm)	Mean annual temperature (°C)
IBLS	West coast	Selangor (IADA Barat Laut Sungai Besar)	SB1-SB2	Parit 2 Barat, Sg. Besar	3°70'N, 100°99'E	37842	223033	5.8	MR219, MR220, MR220CL2, MR263, MR269	July-October/ October-February	60% Direct seeding 40% Transplanting	2000-2500	34-35
			SB3-SB4	Parit 2 1/2, Sg. Panjang	3°67'N, 100°00'E
			SB5-SB6	Jln. Radin Putih, Tjg. Karang	3°68'N, 100°99'E
			SB7-SB8	Jln. Nenas, Tjg. Karang	3°66'N, 101°03'E
			SB9-SB10	Jln. Ban 3, Tjg. Karang	3°67'N, 101°03'E
ISPS	West coast	Penang (IADA Seberang Perai)	PG1-PG2	Sg. Tok Tuntung, Nibong Tebal	5°16'N, 100°44'E	25564	148297	5.8	MR219, MR220, MR220CL1, MR220CL2, MR263, MR269	October-November/ January-February	90% Direct seeding 10% Transplanting	1500-2000	34-35
			PG3-PG4	Sg. Setar, Nibong Tebal	5°14'N, 100°45'E
			PG5-PG6	Tjg. Beremban, Nibong Tebal	5°15'N, 100°40'E
			PG7-PG8	Sg. Acheh, Nibong Tebal	5°14'N, 100°43'E
			PG9-PG10	Sg. Udang, Nibong Tebal	5°16'N, 100°42'E
ISP	West coast	Perak (IADA Seberang Perak)	PK1-PK2	Sg. Buaya, Teluk Intan	4°05'N, 100°87'E	41944	165027	4	MR219, MR220, Others	October-February/ January-May	90% Direct seeding 10% Transplanting	2000-2500	34-35
			PK3-PK4	Sg. Ulu Dedap, Teluk Intan	4°08'N, 100°94'E
			PK5-PK6	Sg. Kerang, Teluk Intan	4°02'N, 100°93'E
			PK7-PK8	Sg. Jejawi, Teluk Intan	4°06'N, 100°93'E
			PK9-PK10	Sg. Timah, Teluk Intan	4°05'N, 100°95'E
MKP	West coast	Perlis (MADA Perlis)	MP1-MP2	Simpang Ampat	6°33'N, 100°17'E	190127	1063247	5.3	MR219, MR220, MR220CL2, MR263, MR269	September-November/ December-February	90% Direct seeding 10% Transplanting	1500-2000	36-37
			MP3-MP4	Jalan Lebai Nawi, Kangar	6°34'N, 100°20'E
			MP5-MP6	Sg. Abi, Kangar	6°53'N, 100°21'E
			MP7-MP8	Wang Ulu, Kangar	6°46'N, 100°16'E
			MP9-MP10	Kayang	6°37'N, 100°19'E
MJK	West coast	Kedah (MADA Jitra)	MJ1-MJ2	Kg. Siputeh, Kokdiang	6°36'N, 100°34'E	190127	1063247	5.3	MR219, MR220, MR220CL2, MR263, MR269	September-November/ December-February	90% Direct seeding 10% Transplanting	1500-2000	36-37
			MJ3-MJ4	Jalan Perlis, Kokdiang	6°39'N, 100°30'E
			MJ5-MJ6	Kg. Kandis, Kokdiang	6°38'N, 100°32'E
			MJ7-MJ8	Melele, Jitra	6°35'N, 100°35'E
			MJ9-MJ10	Kg. Pulau Kabu, Jitra	6°35'N, 100°33'E
IKBT	East coast	Terengganu (IADA Ketara, Besut)	BT1-BT2	Sg. Gerung, Jerteh	5°70'N, 102°56'E	9752	54836	5.6	MR219, MR220, MR220CL1, MR220CL2, MR253, MR263, MR269	November-February/ February-May	100% Direct seeding	3000-3500	30-33
			BT3-BT4	Jln. Putra, Besut	5°79'N, 102°59'E
			BT5-BT6	Kg. Apal, Jerteh	5°70'N, 102°54'E
			BT7-BT8	Kg. Lay Out, Besut	5°79'N, 102°56'E
			BT9-BT10	Sg. Kenak, Jerteh	5°74'N, 102°52'E
KBK	East coast	Kelantan (KADA Bachok)	KB1-KB2	Kg. Rusa, Bachok	6°01'N, 102°38'E	50268	248172	4.6	MR219, MR220, MR220CL2, MR263, MR269, Others	October-February/ January-May	100% Direct seeding	2500-3000	30-33
			KB3-KB4	Pdg. Melintang, Bachok	6°07'N, 102°36'E
			KB5-KB6	Jelawat, Bachok	6°00'N, 102°38'E
			KB7-KB8	Kg. Sri Sentosa, Bachok	6°06'N, 102°39'E
			KB9-KB10	Pauh Sembilan, Bachok	5°90'N, 102°36'E
Sources:
1. Paddy statistics of Malaysia 2015. Department of Agriculture Peninsular Malaysia (2016).
2. The status of the paddy and rice industri in Malaysia. Khazanah Research Institute (2019)
3. Personal communication with every officer from different authorities and regions (MADA, KADA, IADA and MARDI)
4. Jabatan Metereologi Malaysia website
